# Supplementary material
Source: publisher site journal article supplement (https://kjim.org/upload/media/kjim-2023-311-Supplementary-Fig-7.pdf)
Supplement: Supplementary file 1 [file kjim-2023-311-Supplementary-Fig-7.pdf]

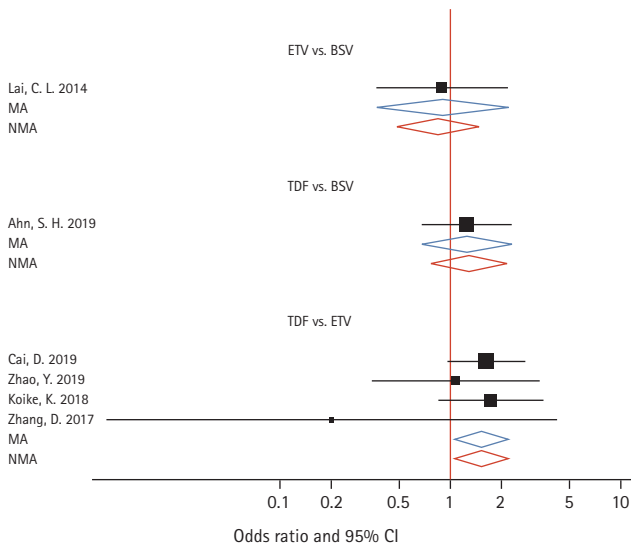

**A**

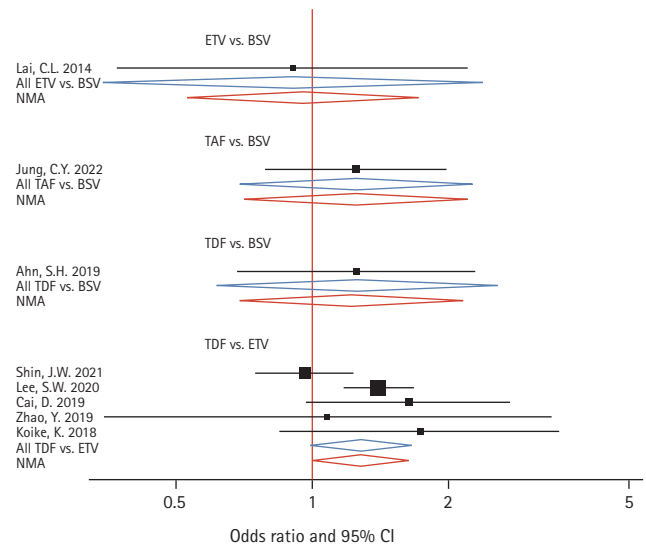

Test of consistency:  $\chi^2(1) = 0.02, p = 0.896$

**B**

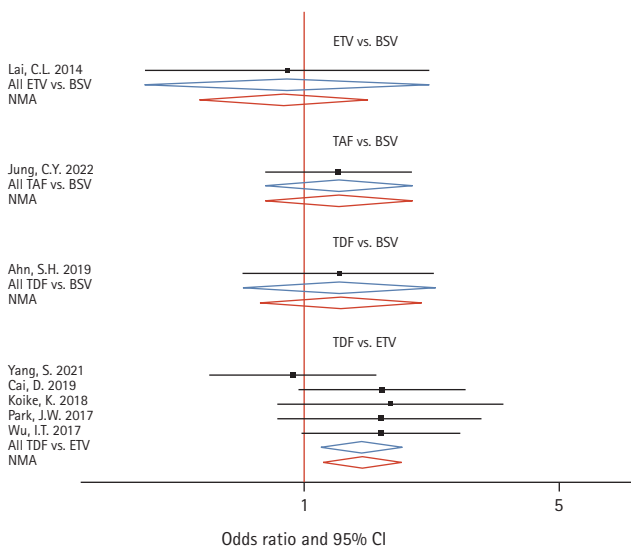

Test of consistency:  $\chi^2(1) = 0.00, p = 0.949$

**C**

**Supplementary Figure 7.** Sensitivity analysis of 48-week virologic response. (A) 48-week virologic response in RCTs. (B) 48-week virologic response in compensated liver diseases. (C) 48-week virologic response in studies which used HBV DNA 20 IU/mL as a lower limit of detection. RCT, randomized controlled trial; HBV, hepatitis B virus; CI, confidence interval; ETV, entecavir; BSV, besifovir dipivoxil maleate; TDF, tenofovir disoproxil fumarate; TAF, tenofovir alafenamide; MA, meta-analysis; NMA, network meta-analysis.
